# Supplementary material
Source: bioRxiv or medRxiv preprint supplement (https://www.biorxiv.org/highwire/filestream/82781/field_highwire_adjunct_files/0/269779-1.pdf)

# S1 Figure

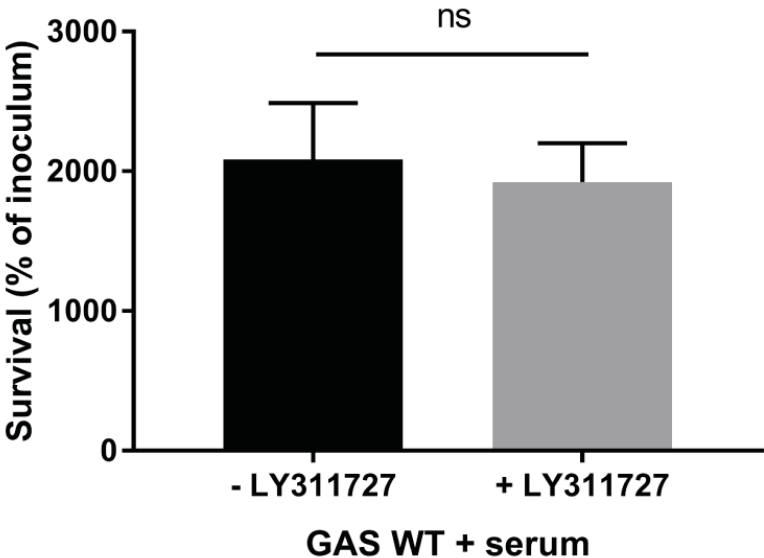

## S2 Figure

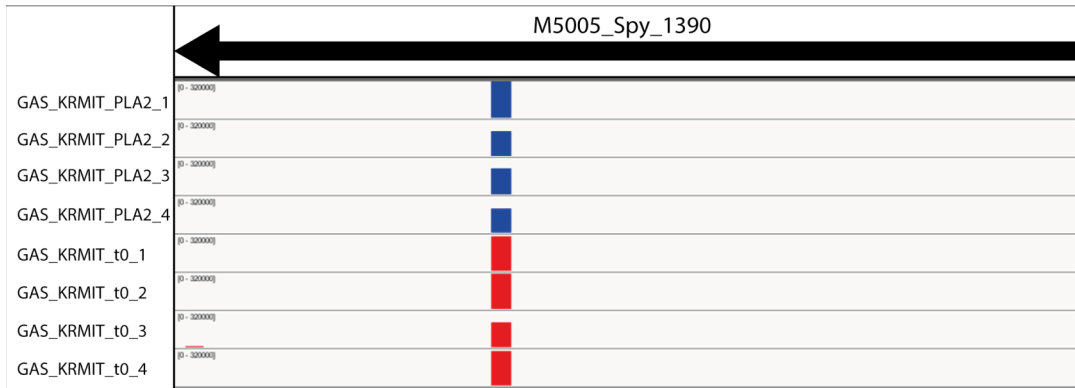

S3 Figure

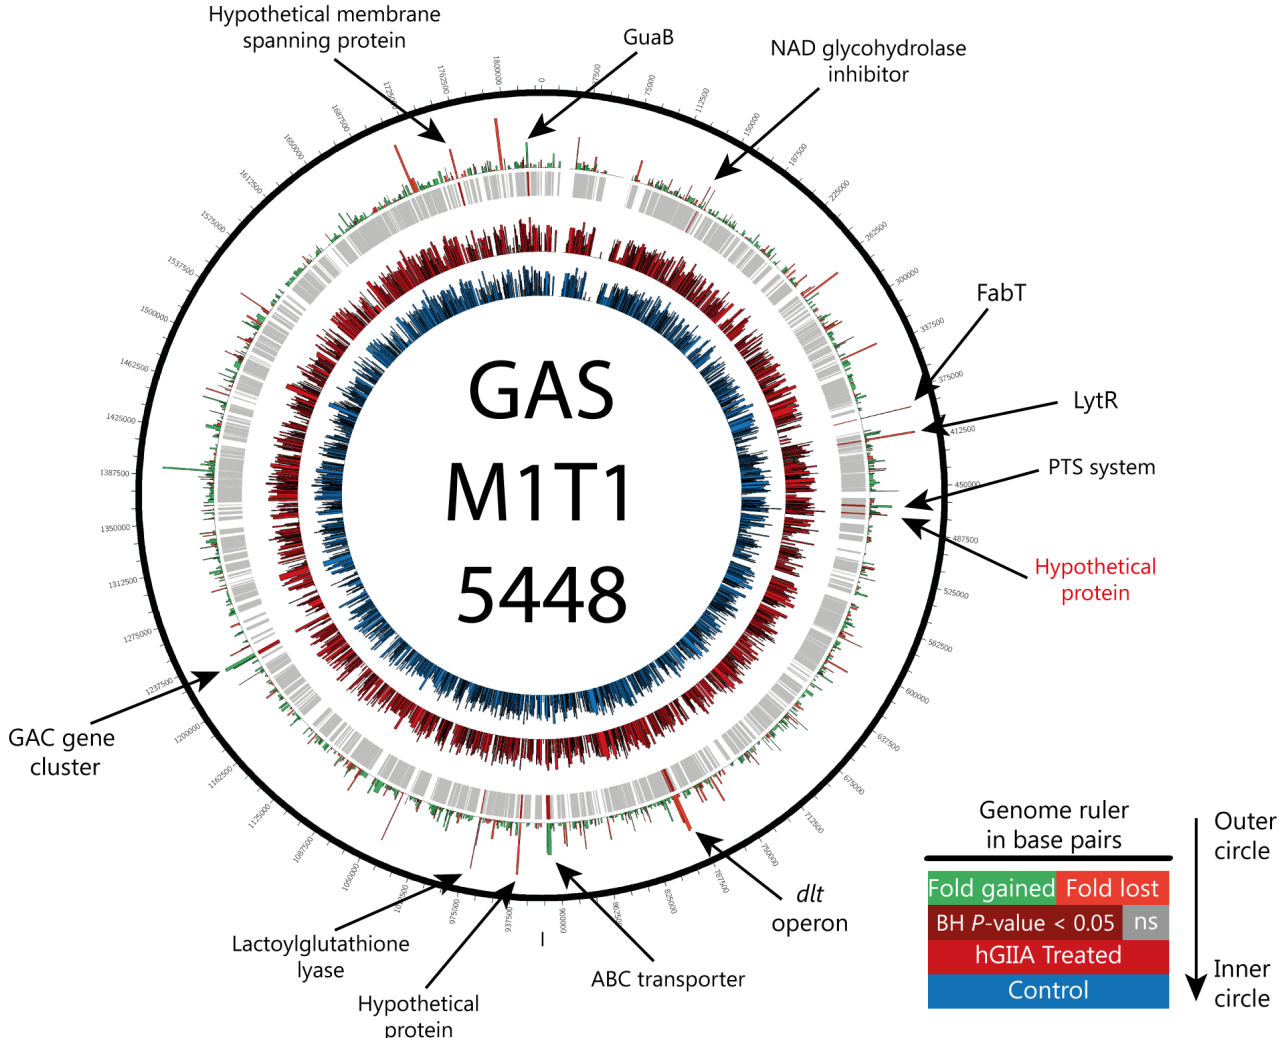

# S4 Figure

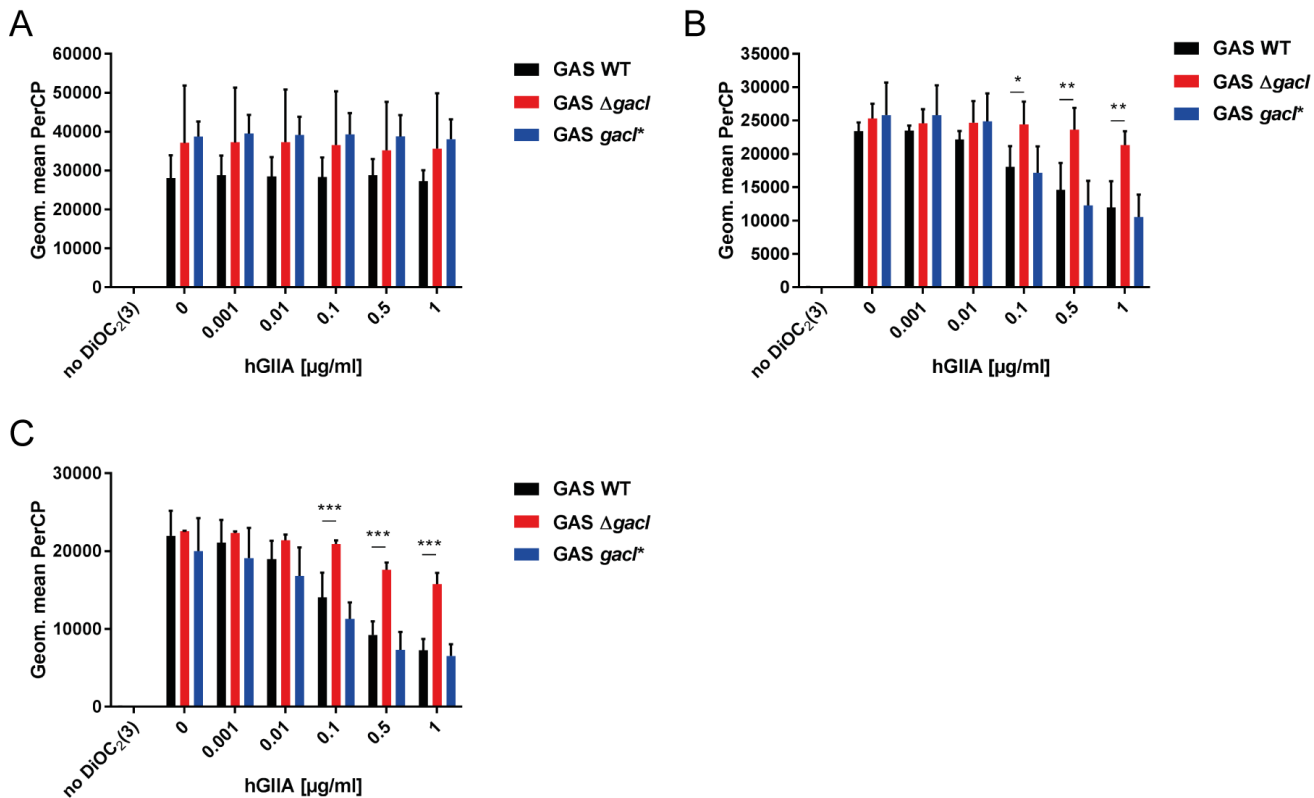

# S5 Figure

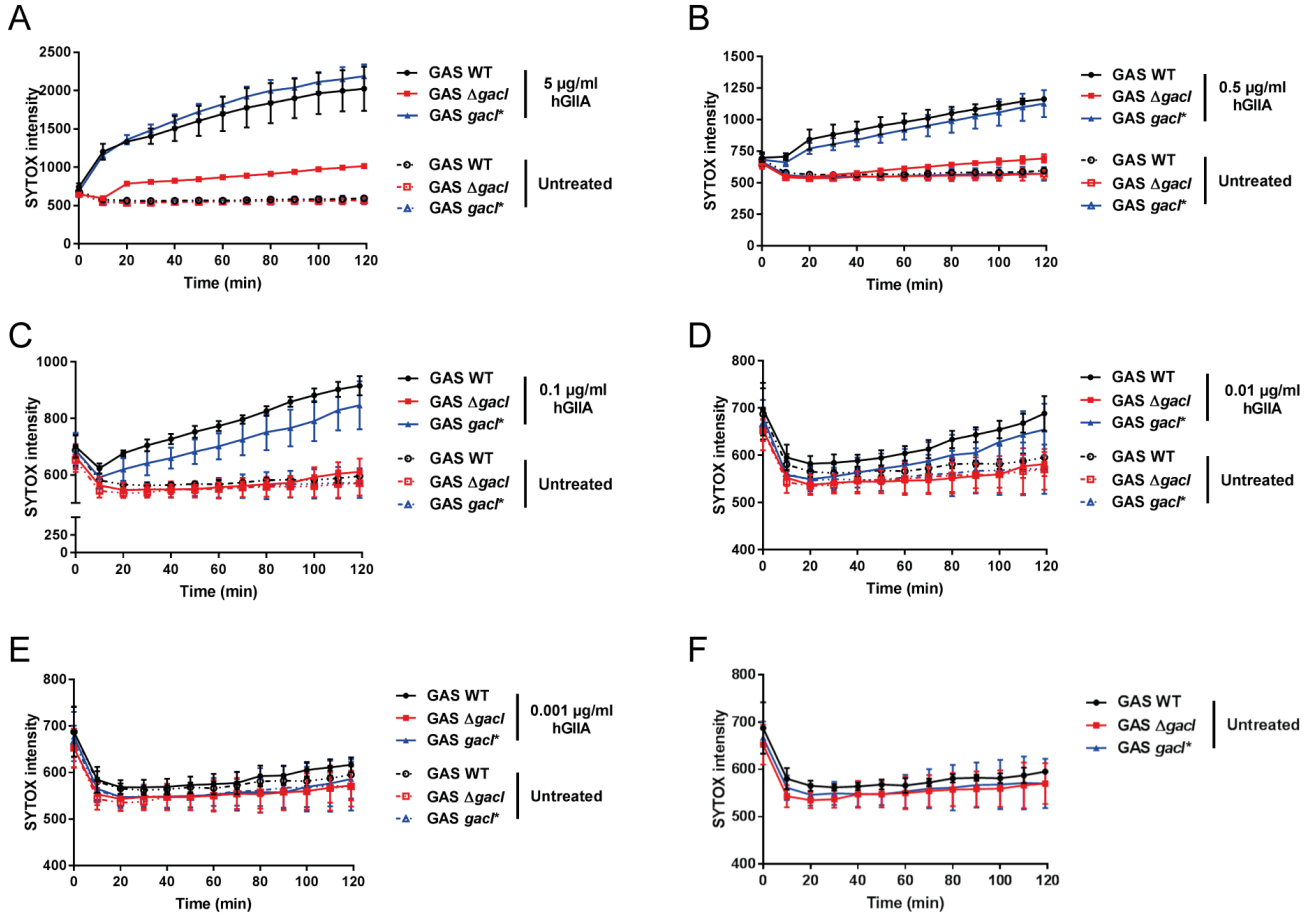

# S6 Figure

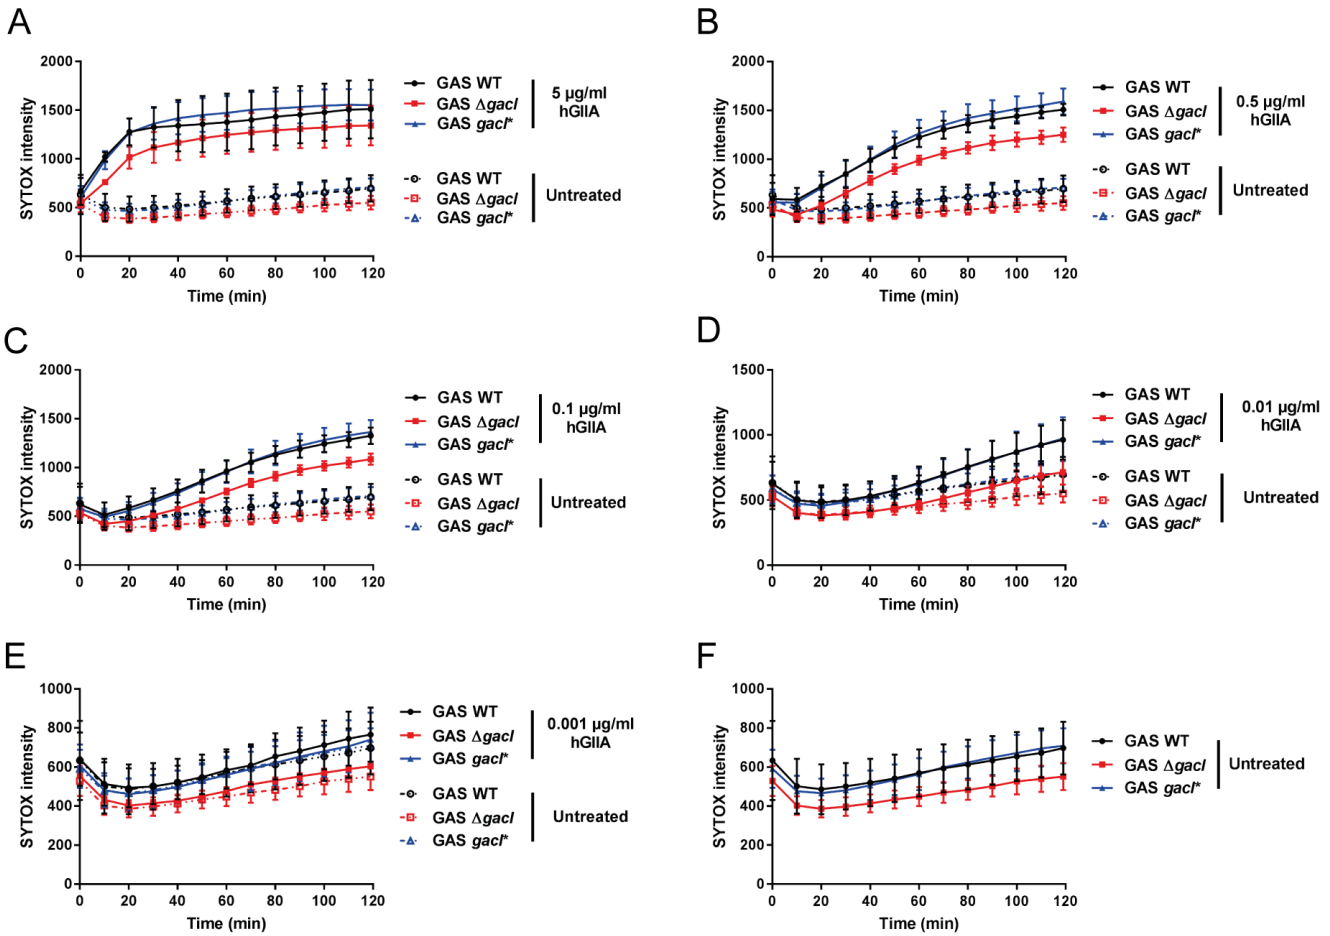

Supplement: Supplementary file [file 269779-1.pdf]
